# Supplementary material for: Preparation and Characterization of Defective TiO2. The Effect of the Reaction Environment on Titanium Vacancies Formation
Source: PubMed Central journal article supplement (PMC7345791; doi:10.3390/ma13122763), 2020-06-18
Supplement: materials-13-02763-s001.pdf [file materials-13-02763-s001.pdf]

Supplementary Material

# Preparation and Characterization of Defective TiO<sub>2</sub>. The Effect of the Reaction Environment on Titanium Vacancies Formation.

Zuzanna Bielan <sup>1,\*</sup>, Szymon Dudziak <sup>1</sup>, Agnieszka Sulowska <sup>1</sup>, Daniel Pelczarski <sup>2</sup>, Jacek Ryl <sup>3</sup>  
and Anna Zielińska-Jurek <sup>1,\*</sup>

<sup>1</sup> Department of Process Engineering and Chemical Technology, Faculty of Chemistry, Gdansk University of Technology (GUT), G. Narutowicza 11/12, 80-233 Gdansk, Poland; sulowska.as@gmail.com (A.S); dudziakszy@gmail.com (S.D.)

<sup>2</sup> Department of Physics of Electronic Phenomena, Faculty of Applied Physics and Mathematics, Gdansk University of Technology (GUT), G. Narutowicza 11/12, 80-233 Gdansk, Poland; daniel.pelczarski@pg.edu.pl

<sup>3</sup> Department of Electrochemistry, Corrosion and Materials Engineering, Faculty of Chemistry, Gdansk University of Technology (GUT), G. Narutowicza 11/12, 80-233 Gdansk, Poland; jacryl@pg.edu.pl

\* Correspondence: annjurek@pg.edu.pl (A.Z.-J.), zuzanna.bielan@gmail.com (Z.B.)

Received: 13 May 2020; Accepted: 16 June 2020; Published: 18 June 2020

In the Figure S1 are presented SEM images for pure TiO<sub>2</sub>-TBT (a,b) and TBT-HIO<sub>3</sub>\_50 (c,d).

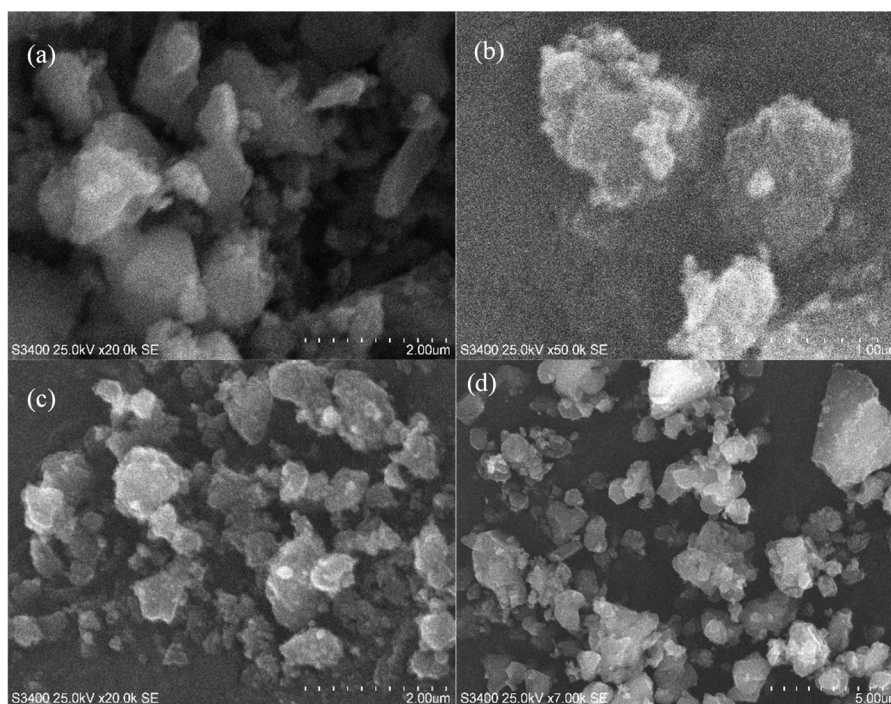

**Figure S1.** SEM analysis of pure TiO<sub>2</sub>-TBT (a,b) and defective TBT-HIO<sub>3</sub>\_50 (c,d) photocatalysts.

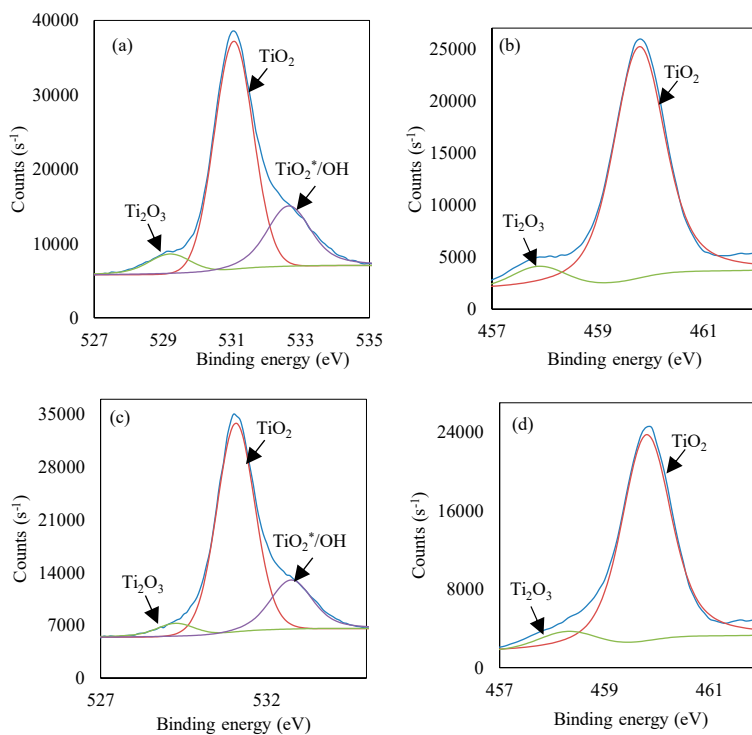

**Figure S2.** Deconvolution of X-ray photoelectron spectroscopy (XPS) for Ti 2p<sub>3/2</sub> and O 1s for TBT-HIO<sub>3</sub>\_50 before (a,b) and after phenol photodegradation (c,d).

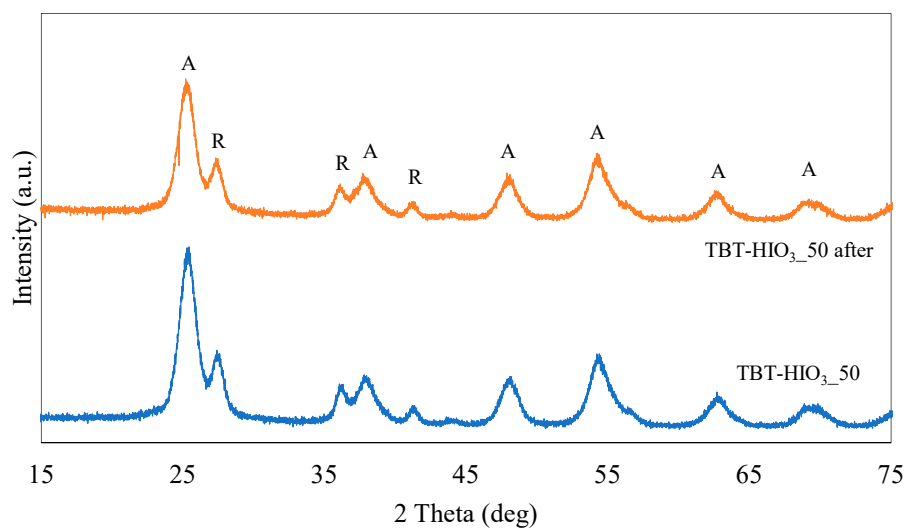

**Figure S3.** XRD patterns for defective TBT-HIO<sub>3</sub>\_50 photocatalyst before and after a photocatalytic phenol degradation (A-anatase, R-rutile).

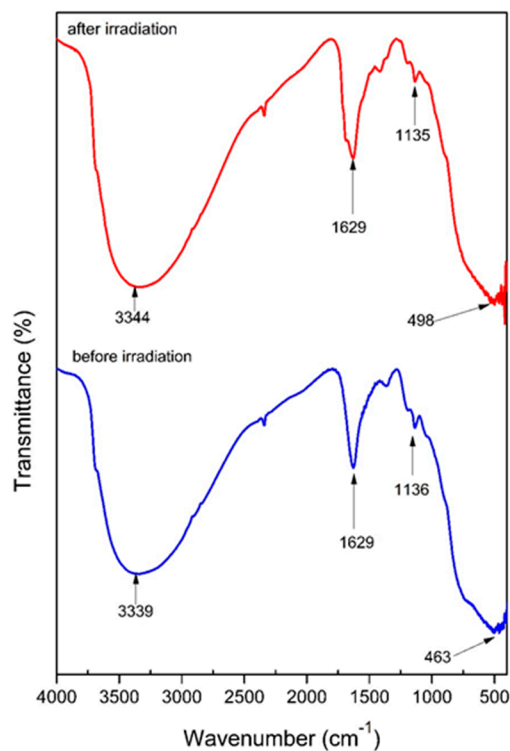

**Figure S4.** Fast-Fourier transformation spectroscopy (FTIR) spectra of defective TBT-HIO<sub>3</sub>\_50 before and after phenol photodegradation.

**Table S1.** Fraction of oxidation states of Ti as well as surface composition of defective TBT-HIO<sub>3</sub>\_50 photocatalyst before and after phenol degradation.

| Photocatalyst                  | Ti 2p <sub>3/2</sub> (%) |                  | O 1s (%) |
|--------------------------------|--------------------------|------------------|----------|
|                                | Ti <sup>4+</sup>         | Ti <sup>3+</sup> |          |
| TBT-HIO <sub>3</sub> _50       | 26.94                    | 1.23             | 71.83    |
| TBT-HIO <sub>3</sub> _50 after | 26.74                    | 1.45             | 71.81    |

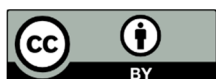

© 2020 by the authors. Licensee MDPI, Basel, Switzerland. This article is an open access article distributed under the terms and conditions of the Creative Commons Attribution (CC BY) license (<http://creativecommons.org/licenses/by/4.0/>).
